# Supplementary material for: Direct formation of large-scale multi-layered germanene on Si substrate
Source: Royal Society of Chemistry journal article supplement (doi:10.1039/c5cp02469b), 2015-01-01
Supplement: c5cp02469b1.pdf [file c5cp02469b1.pdf]

## Supplementary Information

# Direct Formation of Large-Scale Multi-Layered Germanene on Si Substrate

Hsu-Sheng Tsai<sup>1</sup>, Yu-Ze Chen<sup>1</sup>, Henry Medina<sup>1</sup>, Teng-Yu Su<sup>1</sup>, Ta-Shun Chou<sup>2</sup>, Yi-Hsuan Chen<sup>2</sup>, Yu-Lun Chueh<sup>1\*</sup>, Jenq-Horng Liang<sup>3\*</sup>

<sup>1</sup>Department of Material Science and Engineering, National Tsing Hua University, Hsinchu 30013, Taiwan, R.O.C.

<sup>2</sup>Interdisciplinary Program of Sciences, National Tsing Hua University, Hsinchu 30013, Taiwan, R.O.C.

<sup>3</sup>Department of Engineering and System Science and Institute of Nuclear Engineering and Science, National Tsing Hua University, Hsinchu 30013, Taiwan, R.O.C.

\*Corresponding author: [jhliang@ess.nthu.edu.tw](mailto:jhliang@ess.nthu.edu.tw), [ylchueh@mx.nthu.edu.tw](mailto:ylchueh@mx.nthu.edu.tw)

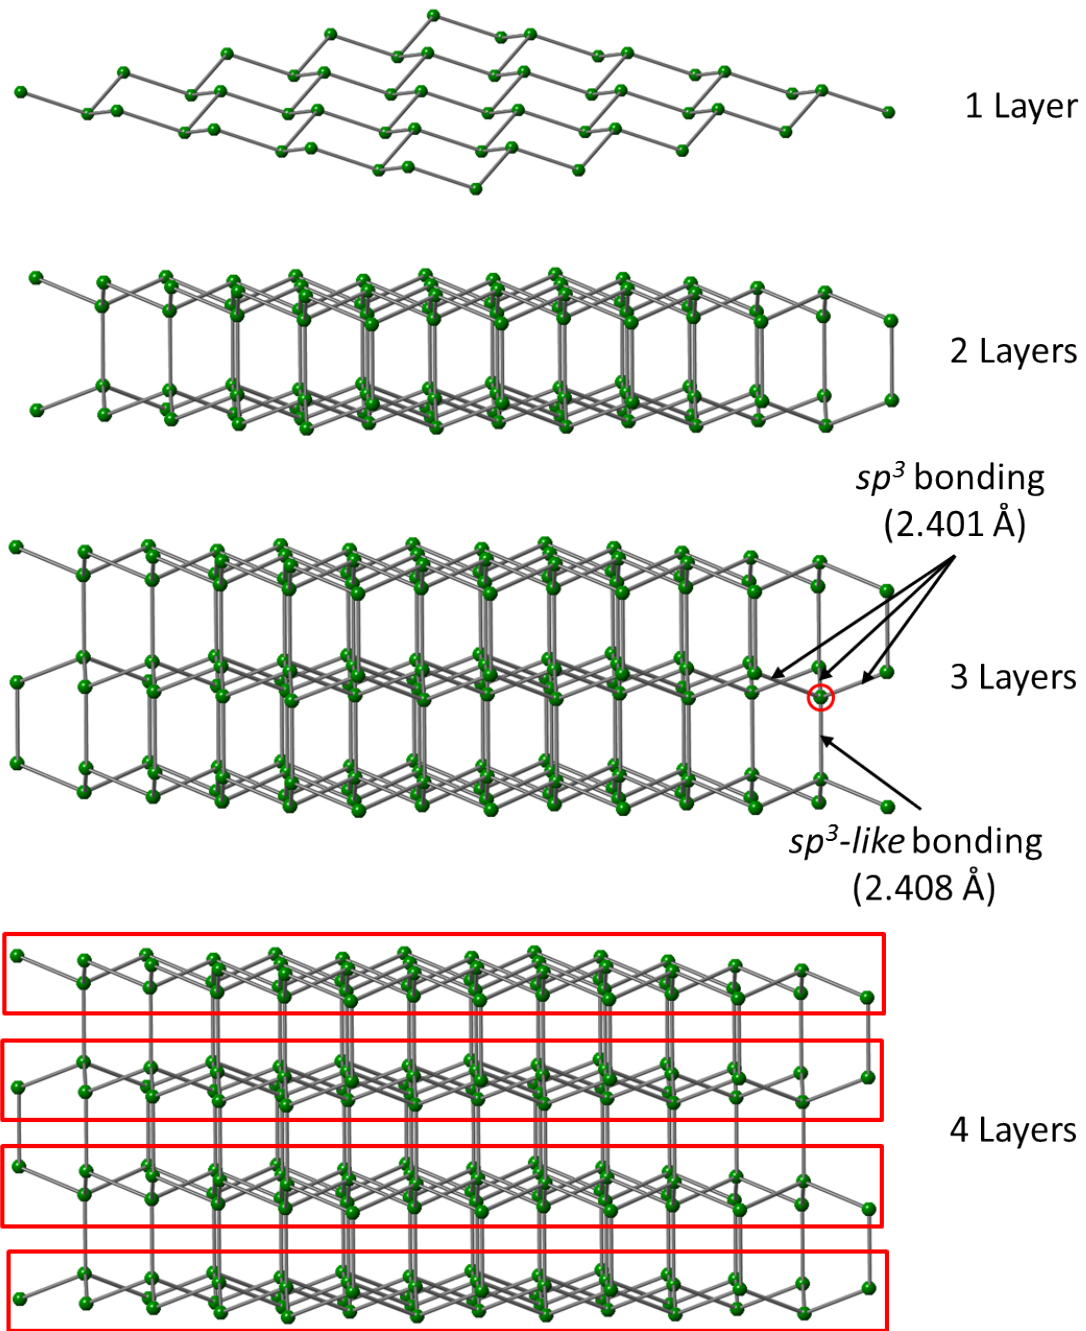

**Figure S1.** The lonsdaleite Ge crystal structure with  $sp^3$ - $sp^3$ -like mixed orbital hybridization.

**Calculation:** The diffraction pattern in Fig. 3c could be used to calculate the interplanar distances. In Supplementary Fig. 2a, the length of green dash line, which contains double reciprocal vector, is equal to  $10.09 \text{ nm}^{-1}$ , so that the length of reciprocal vector is  $5.045 \text{ nm}^{-1}$ . The inverse of  $5.045 \text{ nm}^{-1}$  is equal to  $0.198 \text{ nm}$  that is the interplanar distance of particular planes. In Ref. 1, the computational result indicates the lattice constant ( $a$ ) of lonsdaleite germanium is  $0.392 \text{ nm}$ . The (11-20) interplanar distance is actually equal to  $a/2$  ( $0.196 \text{ nm}$ ) which is consistent with the value from our calculation. On the other hand, the length ( $13.06 \text{ nm}^{-1}$ ) of blue dash line as shown in Supplementary Fig. 2b contains quadruple reciprocal vector. Hence the length of reciprocal vector is  $3.265 \text{ nm}^{-1}$ . The inverse of  $3.265 \text{ nm}^{-1}$  is equal to  $0.306 \text{ nm}$ . In lonsdaleite structure, the  $c/a$  ratio is  $1.64^2$  so that the  $c$  value ( $0.642 \text{ nm}$ ) of germanene is the product of  $0.392$  and  $1.64$ . In the equilibrium state, the (0002) interplanar distance ( $d$ ) is equal to  $c/2^1$ , which is  $0.321 \text{ nm}$ . This calculation result is in agreement with that of experiment and the error is less than 5%, indicating that the results are believable.

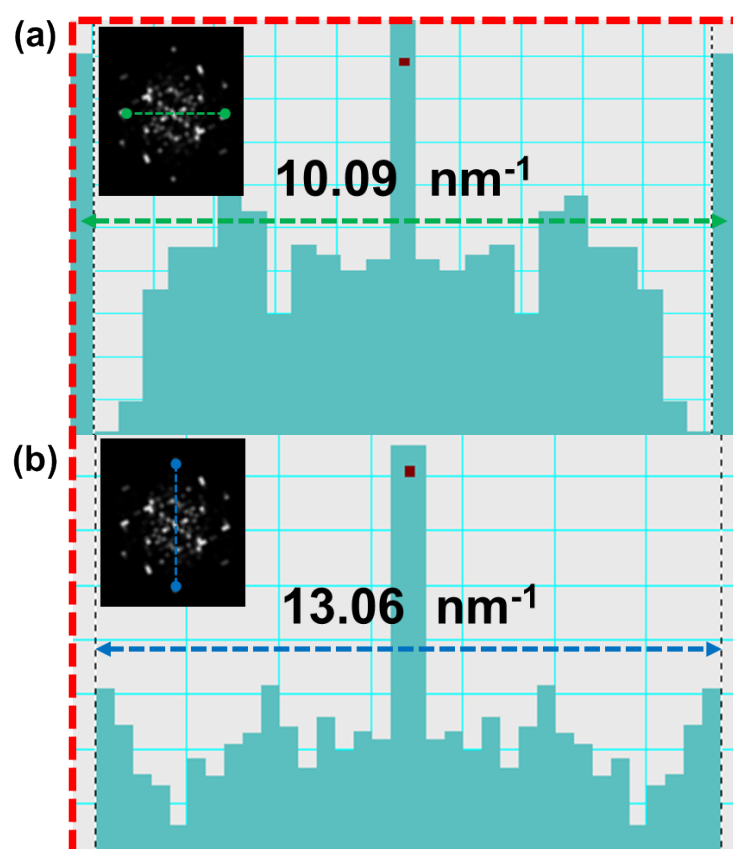

**Figure S2.** (a) The distance between (11-20) reciprocal points, (b) The distance between (0002) reciprocal points.

## References

1. S. Wang, *Phys. Chem. Chem. Phys.*, 2011, **13**, 11929.
2. <http://en.wikipedia.org/wiki/Lonsdaleite>
